# Supplementary material for: Metabolic Effect of Dietary Taurine Supplementation on Grouper (Epinephelus coioides): A 1H-NMR-Based Metabolomics Study
Source: MDPI journal article supplement (doi:10.3390/molecules24122253), 2019-06-17
Supplement: s1 [file s1]

## Supplementary Materials

# Metabolic Effect of Dietary Taurine Supplementation on Grouper (*Epinephelus coioides*): a <sup>1</sup>H NMR-based Metabolomics Study

Guiping Shen <sup>1\*</sup>, Shenghao Wang <sup>1</sup>, Jiyang Dong <sup>1</sup>, Jianghua Feng <sup>1</sup>, Jingjing Xu <sup>1</sup>, Feng  
Xia <sup>1</sup>, Xuexi Wang <sup>2</sup>, Jidan Ye <sup>2\*</sup>

<sup>1</sup> Department of Electronic Science, Fujian Provincial Key Laboratory of Plasma and Magnetic Resonance, Xiamen University, Xiamen 361005, China; 545926975@qq.com (S.W.); jydong@xmu.edu.cn (J.D.); jianghua.feng@xmu.edu.cn (J.F.); jingjing@xmu.edu.cn (J.X.); xiafeng@xmu.edu.cn (F.X.);

<sup>2</sup> Fisheries College, Xiamen Key Laboratory for Feed Quality Testing and Safety Evaluation, Jimei University, Xiamen 361021, China; 1508498684@qq.com (X.W.)

\* Authors to whom correspondence should be addressed:

<sup>1</sup> 422 Siming South Road, Xiamen University, Xiamen, Fujian Province 361005, China. Tel.: +86 592 2184026, Fax: +86 2189426.

Email address: gpshen@xmu.edu.cn (G.S.)

<sup>2</sup> 43 Yindou Road, Jimei University, Xiamen, Fujian Province 361021, China.

Tel./fax: +86 592 6181054.

Email address: 200461000010@jmu.edu.cn (J.Y.)

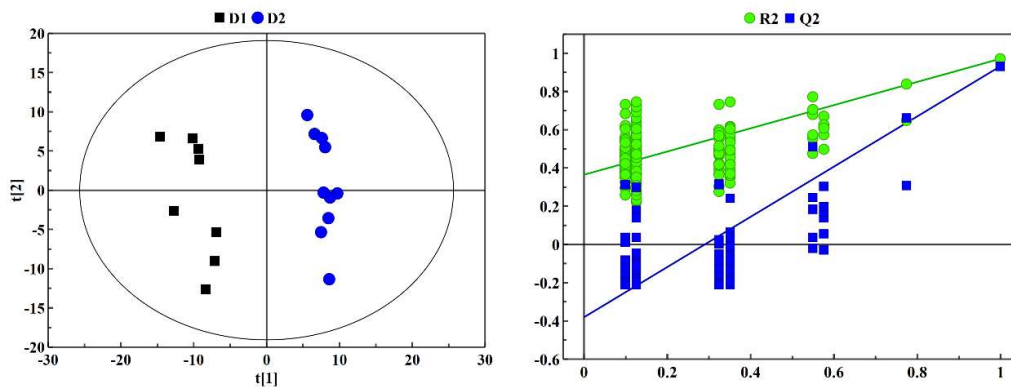

1

2 (A) D1-D2,  $R^2X=0.591$ ,  $R^2Y=0.972$ ,  $Q^2=0.932$

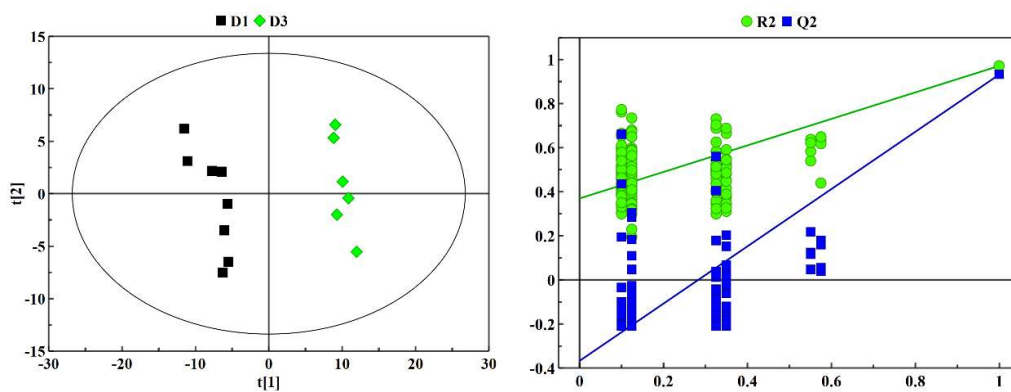

3

4 (B) D1-D3,  $R^2X=0.447$ ,  $R^2Y=0.981$ ,  $Q^2=0.875$

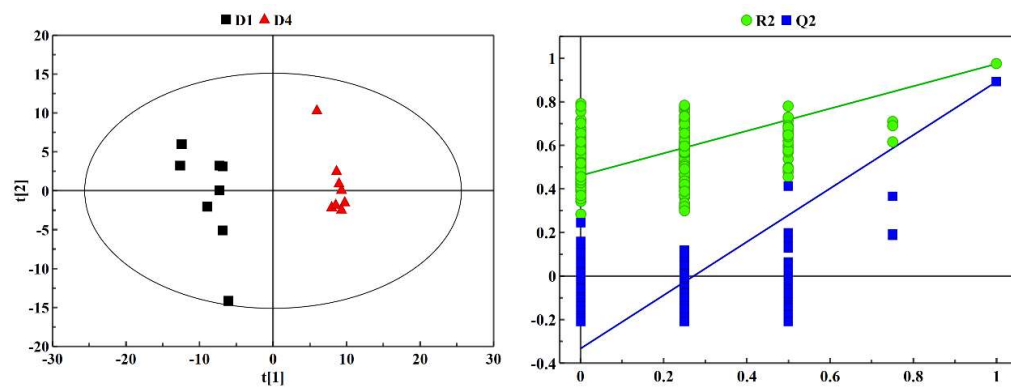

5

6 (C) D1-D4,  $R^2X=0.525$ ,  $R^2Y=0.974$ ,  $Q^2=0.892$

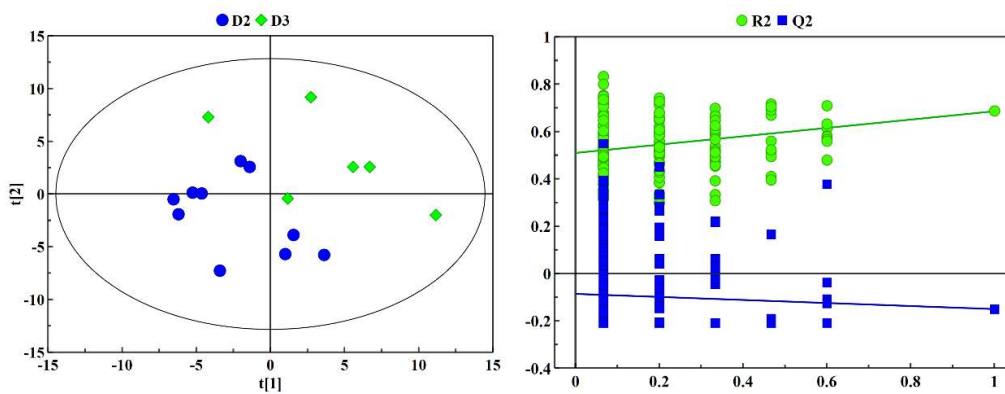

(D) D2-D3,  $R^2X=0.430$ ,  $R^2Y=0.685$ ,  $Q^2=-0.150$

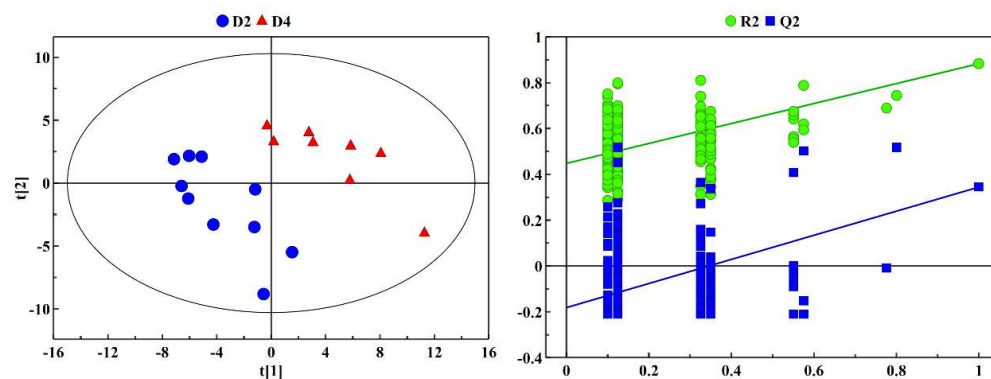

(E) D2-D4,  $R^2X=0.294$ ,  $R^2Y=0.883$ ,  $Q^2=0.344$

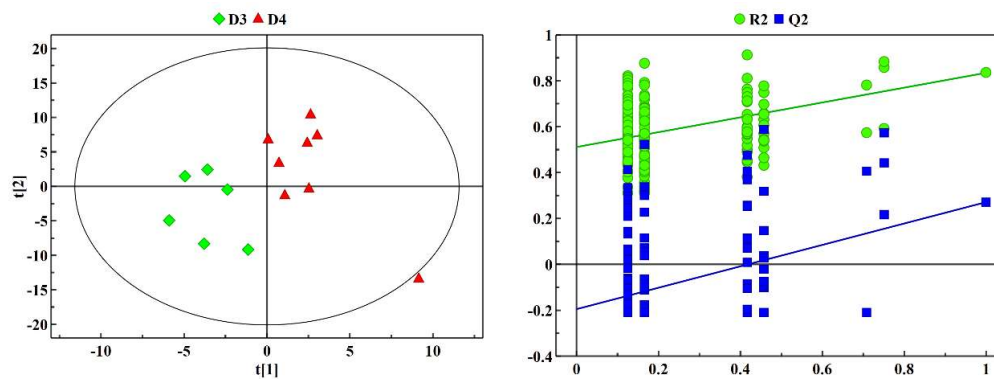

(F) D3-D4,  $R^2X=0.467$ ,  $R^2Y=0.834$ ,  $Q^2=0.271$

**Figure S1.** PLS-DA scores plots (left panel) and validate model plots (right panel) by permutation tests ( $n=200$ ) for  $^1\text{H}$  NMR spectra of grouper intestine between different taurine-supplemented groups at FD84. (A) D1-D2; (B) D1-D3; (C) D1-D4; (D) D2-D3; (E) D2-D4; (F) D3-D4.

**Table S1** Ingredients and composition of experimental diets (on an as fed basis)

| Ingredients (%)            | Diets at different taurine inclusion contents |           |           |           |
|----------------------------|-----------------------------------------------|-----------|-----------|-----------|
|                            | D1 (0.0%)                                     | D2 (0.5%) | D3 (1.0%) | D4 (1.5%) |
| Casein                     | 47                                            | 47        | 47        | 47        |
| Gelatin                    | 8                                             | 8         | 8         | 8         |
| Wheat flour                | 24                                            | 24        | 24        | 24        |
| Fish oil                   | 3                                             | 3         | 3         | 3         |
| Soybean oil                | 3                                             | 3         | 3         | 3         |
| Soybean lecithin           | 3                                             | 4         | 4         | 4         |
| Vitamin mix <sup>1</sup>   | 0.2                                           | 0.2       | 0.2       | 0.2       |
| Mineral mix <sup>2</sup>   | 0.3                                           | 0.3       | 0.3       | 0.3       |
| Vitamin C                  | 0.02                                          | 0.02      | 0.02      | 0.02      |
| Monocalcium phosphate      | 2                                             | 2         | 2         | 2         |
| Choline chloride           | 0.3                                           | 0.3       | 0.3       | 0.3       |
| Shrimp meal                | 3                                             | 3         | 3         | 3         |
| Microcrystalline cellulose | 3.18                                          | 2.68      | 2.18      | 1.68      |
| Taurine                    | 0                                             | 0.5       | 1.0       | 1.5       |
| <b>Nutrient level (%)</b>  |                                               |           |           |           |
| Dry matter                 | 90.81                                         | 90.76     | 90.24     | 90.21     |
| Crude protein              | 49.55                                         | 49.21     | 49.13     | 49.56     |
| Crude lipid                | 8.78                                          | 8.61      | 8.54      | 8.71      |
| Ash                        | 2.21                                          | 2.54      | 2.35      | 2.42      |
| Taurine                    | 0.10                                          | 0.49      | 0.96      | 1.47      |

<sup>1</sup> Vitamin premix consisted of (mg /kg diet) the following: vitamin A 10; vitamin D 10; vitamin K 40; vitamin E 100; vitamin B1 60; vitamin B2 70; vitamin B6 80; vitamin B12 0.4; nicotinic acid 200; calcium pantothenate 200; biotin 2; inositol 500; folic acid 8.

<sup>2</sup> Mineral premix consisted of (mg /kg diet) the following: FeSO<sub>4</sub>·7H<sub>2</sub>O 497.84, CuSO<sub>4</sub>·5H<sub>2</sub>O 11.8, ZnSO<sub>4</sub>·7H<sub>2</sub>O 175.84, MnSO<sub>4</sub>·4H<sub>2</sub>O 121.8, CoCl<sub>2</sub>·6H<sub>2</sub>O 0.18, KIO<sub>3</sub> 0.51, Na<sub>2</sub>SeO<sub>3</sub> 0.33.

24 **Table S2** Metabolites identified from NMR spectra of grouper intestine and the  
 25 corresponding assignments

| Number | Metabolites             | Abbreviation | HMDB ID | <sup>1</sup> H NMR chemical shift (ppm) (multiplicity) <sup>a</sup> | Assignment <sup>b</sup>                                                          |
|--------|-------------------------|--------------|---------|---------------------------------------------------------------------|----------------------------------------------------------------------------------|
| 1      | 1-Methylhistidine       | 1-MH         | 0000001 | 7.06(s), 7.78(s)                                                    | CH(2), CH(4)                                                                     |
| 2      | 2-oxoisocaproate        | 2-Ox         | 0000695 | 2.61 (d)                                                            | CH <sub>2</sub>                                                                  |
| 3      | 3-Hydroxybutyrate       | 3-HB         | 0041603 | 1.20(d), 2.31(dd), 2.40(m),<br>4.16(m)                              | CH <sub>3</sub>                                                                  |
| 4      | 3-Methylhistidine       | 3-MH         | 0000479 | 7.03(s)                                                             | CH(4)                                                                            |
| 5      | Acetate                 | Ace          | 0029699 | 1.92(s)                                                             | CH <sub>3</sub> ,                                                                |
| 6      | Adenosine               | Ade          | 0000050 | 4.29(dd),4.44(dd),6.11(d),<br>8.37(s)                               | CH(2), N-CH=N                                                                    |
| 7      | Adenosine monophosphate | AMP          | 0000045 | 4.52(d),6.15(d),8.27(s),<br>8.61(s)                                 | CH-N, N-CH=N,<br>N-CH'=N                                                         |
| 8      | Alanine                 | Ala          | 0028878 | 1.48(d)                                                             | CH <sub>3</sub>                                                                  |
| 9      | Anserine                | Ans          | 0000194 | 7.78 (s)                                                            | CH(4)                                                                            |
| 10     | Asparagine              | Asn          | 0029012 | 2.88(dd),2.95(dd),3.99(dd)                                          | β-CH, β'-CH, α-CH                                                                |
| 11     | Aspartate               | Asp          | 0028749 | 2.70(dd),2.81(dd),3.94(dd)                                          | β-CH, β-CH', α-CH                                                                |
| 12     | Choline                 | Ch           | 0000097 | 3.20(s)                                                             | CH <sub>3</sub>                                                                  |
| 13     | Creatine                | Cr           | 0000064 | 3.04(s), 3.93(s)                                                    | CH <sub>3</sub> , CH <sub>2</sub>                                                |
| 14     | Cytidine                | Cyd          | 0000089 | 5.87(d),7.81(d)                                                     | CH(5),CH(6)                                                                      |
| 15     | Dimethylamine           | DMA          | 0000087 | 2.72(s)                                                             | CH <sub>3</sub>                                                                  |
| 16     | Ethanolamine            | EA           | 0000149 | 3.11(t),3.86(t)                                                     | CH <sub>2</sub> NH <sub>2</sub> , CH <sub>2</sub> OH                             |
| 17     | Formate                 | For          | 0031351 | 8.46(s)                                                             | CH                                                                               |
| 18     | Fumarate                | Fum          | 0031257 | 6.52(s)                                                             | CH                                                                               |
| 19     | Glutamate               | Glu          | 0028994 | 2.08(m), 2.11(m), 2.35(m),<br>3.75(t)                               | α-CH, β-CH <sub>2</sub> , γ-CH <sub>2</sub>                                      |
| 20     | Glutamine               | Gln          | 0028861 | 2.14(m), 2.45(m), 3.75(t)                                           | γ-CH <sub>2</sub> , α-CH                                                         |
| 21     | Glycerol                | G            | 0000131 | 3.55(m), 3.66(dd), 3.78(m)                                          | CH <sub>2</sub> , CH <sub>2</sub> '                                              |
| 22     | Glycine                 | Gly          | 0000123 | 3.56(s)                                                             | CH                                                                               |
| 23     | Hypoxanthine            | HX           | 0000157 | 8.20(s)                                                             | CH(7)                                                                            |
| 24     | Inosine                 | Ino          | 0000195 | 4.26(dd),6.08(d),8.25(s),<br>8.34(s)                                | CH(5), CH(2), N-CH'=N                                                            |
| 25     | Isobutyrate             | IB           | 0037189 | 1.07(d)                                                             | β-CH <sub>3</sub>                                                                |
| 26     | Isoleucine              | Ile          | 0028844 | 0.94(t), 1.01(d),1.26(m)                                            | δ-CH <sub>3</sub> , β-CH <sub>3</sub>                                            |
| 27     | Lactate                 | Lac          | 0037212 | 1.33(d), 4.11(q)                                                    | CH <sub>3</sub> , CH                                                             |
| 28     | Leucine                 | Leu          | 0028735 | 0.96(t)                                                             | CH <sub>3</sub>                                                                  |
| 29     | Lysine                  | Lys          | 0003405 | 1.46(m), 1.73(m), 1.91(m),<br>3.03(m), 3.76(t)                      | δ-CH <sub>3</sub> , β-CH <sub>3</sub> , ε-CH <sub>3</sub> ,<br>α-CH <sub>3</sub> |
| 30     | Malonate                | M            | 0029537 | 3.11(s)                                                             | CH <sub>2</sub>                                                                  |
| 31     | Methanol                | Mol          | 0001875 | 3.36(s)                                                             | CH <sub>3</sub>                                                                  |
| 32     | Methionine              | Met          | 0002005 | 2.14(s), 2.63(t)                                                    | S-CH <sub>3</sub> , β-CH <sub>3</sub> , S-CH <sub>2</sub>                        |

|    |                                         |               |         |                                                                                                |                                                                                                                             |
|----|-----------------------------------------|---------------|---------|------------------------------------------------------------------------------------------------|-----------------------------------------------------------------------------------------------------------------------------|
| 33 | myo-Inositol                            | m-I           | 0000213 | 3.52(dd), 3.61(dd), 4.07(m)                                                                    | CH(1), CH(2), CH(3),<br>CH(4), CH(6)                                                                                        |
| 34 | Nicotinamide<br>adenine<br>dinucleotide | NAD           | 0000902 | 4.37(m), 4.42(m), 4.49(m),<br>4.51(m), 6.04(d), 6.12(d),<br>8.42(d), 8.83(d), 9.14(d), 9.34(s) | CH(2), CH(3), CH-OH,<br>O-CH-N, CH(7),<br>CH <sub>2</sub> (39)                                                              |
| 35 | Phenylalanine                           | Phe           | 0028892 | 4.00(m), 7.32(d), 7.37(t),<br>7.42(s)                                                          | o-CH, p-CH, m-CH                                                                                                            |
| 36 | Phosphocholine                          | PC            | 0001565 | 3.21(s), 4.18(m)                                                                               | CH <sub>3</sub>                                                                                                             |
| 37 | Proline                                 | Pro           | 0029113 | 3.33(m)                                                                                        | $\gamma$ -CH <sub>2</sub> , half $\beta$ -CH <sub>2</sub> , half<br>$\beta$ -CH <sub>2</sub> $\delta$ -CH <sub>2</sub> , CH |
| 38 | Pyruvate                                | Py            | 0031643 | 2.37(s)                                                                                        | CH <sub>3</sub>                                                                                                             |
| 39 | Succinate                               | Suc           | 0033837 | 2.40(s)                                                                                        | CH                                                                                                                          |
| 40 | Taurine                                 | Tau           | 0000251 | 3.27(t), 3.42(t),                                                                              | CH <sub>2</sub> SO <sub>3</sub> , NCH <sub>2</sub>                                                                          |
| 41 | Trimethylamine                          | TMA           | 0000906 | 2.89(s)                                                                                        | CH <sub>3</sub>                                                                                                             |
| 42 | Tyrosine                                | Tyr           | 0028765 | 6.90(d), 7.19(d)                                                                               | m-CH, o-CH                                                                                                                  |
| 43 | Uracil                                  | Uc            | 0000300 | 5.80(d), 7.55(d)                                                                               | CH(5), CH(6)                                                                                                                |
| 44 | Uridine                                 | Ud            | 0000296 | 4.24(t), 4.36(t), 5.91(d),<br>5.93(d), 7.89(d)                                                 | CH(a), CH(b), CH(c),<br>CH(5), CH(6)                                                                                        |
| 45 | Uridine diphosphate<br>glucose          | UDG           | 0000286 | 5.61(dd), 5.97(m), 7.96(d)                                                                     | CH(2), CH(21), CH(31),<br>N-CH=C                                                                                            |
| 46 | Urocanate                               | Urc           | 0000301 | 6.39(d), 7.38(s), 7.81(s)                                                                      | CHCOOH, CH=C,<br>CH=N                                                                                                       |
| 47 | Valine                                  | Val           | 0000883 | 0.99(d), 1.04(d), 2.28(m)                                                                      | $\gamma$ -CH <sub>3</sub> , $\gamma$ -CH <sub>3</sub> '                                                                     |
| 48 | $\alpha$ -Glucose                       | $\alpha$ -Glc | 0062621 | 3.42(t), 3.54, 3.71(t),<br>3.73(m), 3.84(m), 5.24(d)                                           | CH(2), CH(3),<br>CH(5&6'), CH(1)                                                                                            |
| 49 | $\alpha$ -Ketoglutarate                 | Kg            | 0061388 | 2.45(t), 3.01(t)                                                                               | $\gamma$ -CH <sub>2</sub>                                                                                                   |
| 50 | $\beta$ -Glucose                        | $\beta$ -Glc  | 0062476 | 3.24(dd), 3.41(t), 3.46(m),<br>3.49(t), 3.90(dd)                                               | CH(5), CH(3), CH(6),<br>CH(1)                                                                                               |

26 <sup>a</sup> Multiplicity: s, singlet; d, doublet; t, triplet; q, quartet; dd, doublet of doublets; m, multiplet.

27 <sup>b</sup> Assignment: according to the HMDB database ([www.hmdb.ca](http://www.hmdb.ca)).

28

**Table S3** Relative concentration value (Mean  $\pm$  SD) of different metabolites by the calculation of characteristic peaks during the 84 days feeding trail

| Metabolites             | characteristic peaks (ppm) | FD28            |                 |                 |                 | FD56            |                 |                 |                 | FD84            |                 |                 |                 |
|-------------------------|----------------------------|-----------------|-----------------|-----------------|-----------------|-----------------|-----------------|-----------------|-----------------|-----------------|-----------------|-----------------|-----------------|
|                         |                            | D1              | D2              | D3              | D4              | D1              | D2              | D3              | D4              | D1              | D2              | D3              | D4              |
| 1-Methylhistidine       | 7.06(s)                    | 0.85 $\pm$ 0.20 | 0.76 $\pm$ 0.24 | 1.20 $\pm$ 0.41 | 1.06 $\pm$ 0.22 | 0.82 $\pm$ 0.13 | 1.05 $\pm$ 0.25 | 1.03 $\pm$ 0.22 | 1.24 $\pm$ 0.27 | 0.46 $\pm$ 0.21 | 0.60 $\pm$ 0.09 | 0.63 $\pm$ 0.16 | 0.96 $\pm$ 0.21 |
| 2-oxoisocaproate        | 2.61(d)                    | 0.03 $\pm$ 0.03 | 0.06 $\pm$ 0.09 | 0.16 $\pm$ 0.18 | 0.10 $\pm$ 0.10 | 0.02 $\pm$ 0.03 | 0.03 $\pm$ 0.05 | 0.01 $\pm$ 0.03 | 0.03 $\pm$ 0.04 | 0.04 $\pm$ 0.06 | 0.08 $\pm$ 0.06 | 0.11 $\pm$ 0.11 | 0.04 $\pm$ 0.02 |
| 3-Hydroxybutyrate       | 1.20(d)                    | 0.24 $\pm$ 0.08 | 0.13 $\pm$ 0.04 | 0.23 $\pm$ 0.13 | 0.95 $\pm$ 0.54 | 0.25 $\pm$ 0.15 | 0.16 $\pm$ 0.05 | 0.24 $\pm$ 0.07 | 0.15 $\pm$ 0.03 | 0.39 $\pm$ 0.43 | 0.23 $\pm$ 0.04 | 0.23 $\pm$ 0.09 | 0.27 $\pm$ 0.09 |
| 3-Methylhistidine       | 7.03(s)                    | 0.85 $\pm$ 0.20 | 0.76 $\pm$ 0.24 | 1.20 $\pm$ 0.41 | 1.06 $\pm$ 0.22 | 0.82 $\pm$ 0.13 | 1.05 $\pm$ 0.25 | 1.03 $\pm$ 0.22 | 1.24 $\pm$ 0.27 | 0.46 $\pm$ 0.21 | 0.60 $\pm$ 0.09 | 0.63 $\pm$ 0.16 | 0.75 $\pm$ 0.21 |
| Acetate                 | 1.92(s)                    | 1.55 $\pm$ 0.64 | 1.51 $\pm$ 0.68 | 1.05 $\pm$ 0.26 | 1.59 $\pm$ 0.54 | 0.71 $\pm$ 0.24 | 0.97 $\pm$ 0.32 | 0.86 $\pm$ 0.27 | 0.96 $\pm$ 0.22 | 0.90 $\pm$ 0.33 | 1.14 $\pm$ 0.24 | 0.98 $\pm$ 0.15 | 0.96 $\pm$ 0.18 |
| Adenosine               | 8.37(s)                    | 0.56 $\pm$ 0.74 | 0.54 $\pm$ 0.66 | 0.88 $\pm$ 0.93 | 0.68 $\pm$ 0.92 | 1.58 $\pm$ 0.73 | 1.83 $\pm$ 0.64 | 1.75 $\pm$ 1.02 | 1.81 $\pm$ 0.91 | 2.55 $\pm$ 0.41 | 2.79 $\pm$ 0.38 | 2.35 $\pm$ 1.28 | 2.40 $\pm$ 0.59 |
| Adenosine monophosphate | 8.61(s)                    | 0.06 $\pm$ 0.05 | 0.10 $\pm$ 0.06 | 0.06 $\pm$ 0.04 | 0.09 $\pm$ 0.04 | 0.05 $\pm$ 0.04 | 0.04 $\pm$ 0.03 | 0.06 $\pm$ 0.06 | 0.05 $\pm$ 0.04 | 0.01 $\pm$ 0.02 | 0.01 $\pm$ 0.02 | 0.01 $\pm$ 0.01 | 0.01 $\pm$ 0.01 |
| Alanine                 | 1.48(d)                    | 3.21 $\pm$ 0.33 | 2.71 $\pm$ 0.44 | 2.95 $\pm$ 0.62 | 3.59 $\pm$ 0.43 | 2.84 $\pm$ 0.55 | 3.11 $\pm$ 0.76 | 3.19 $\pm$ 0.64 | 3.45 $\pm$ 0.67 | 1.70 $\pm$ 0.41 | 2.07 $\pm$ 0.27 | 2.13 $\pm$ 0.28 | 2.19 $\pm$ 0.47 |
| Anserine                | 7.78(s)                    | 0.59 $\pm$ 0.16 | 0.41 $\pm$ 0.22 | 0.52 $\pm$ 0.43 | 0.64 $\pm$ 0.42 | 0.56 $\pm$ 0.22 | 0.66 $\pm$ 0.27 | 0.67 $\pm$ 0.30 | 0.78 $\pm$ 0.33 | 0.33 $\pm$ 0.15 | 0.33 $\pm$ 0.13 | 0.44 $\pm$ 0.22 | 0.48 $\pm$ 0.19 |
| Asparagine              | 2.95(dd)                   | 0.45 $\pm$ 0.33 | 0.66 $\pm$ 0.19 | 1.08 $\pm$ 0.45 | 0.64 $\pm$ 0.35 | 0.64 $\pm$ 0.13 | 0.76 $\pm$ 0.22 | 0.70 $\pm$ 0.24 | 0.89 $\pm$ 0.26 | 0.39 $\pm$ 0.10 | 0.41 $\pm$ 0.16 | 0.55 $\pm$ 0.07 | 0.49 $\pm$ 0.17 |
| Aspartate               | 2.81(dd)                   | 0.56 $\pm$ 0.60 | 0.23 $\pm$ 0.31 | 0.32 $\pm$ 0.46 | 0.58 $\pm$ 0.51 | 0.22 $\pm$ 0.27 | 0.11 $\pm$ 0.21 | 0.11 $\pm$ 0.14 | 0.10 $\pm$ 0.11 | 1.16 $\pm$ 0.39 | 0.83 $\pm$ 0.61 | 0.69 $\pm$ 0.48 | 0.31 $\pm$ 0.53 |
| Choline                 | 3.20(s)                    | 1.04 $\pm$ 0.53 | 1.24 $\pm$ 0.70 | 0.92 $\pm$ 0.41 | 1.13 $\pm$ 0.51 | 1.36 $\pm$ 0.63 | 1.38 $\pm$ 0.67 | 1.34 $\pm$ 0.61 | 1.21 $\pm$ 0.49 | 1.39 $\pm$ 0.61 | 0.90 $\pm$ 0.57 | 0.68 $\pm$ 0.48 | 0.82 $\pm$ 0.47 |
| Creatine                | 3.04(s)                    | 5.03 $\pm$ 0.67 | 6.36 $\pm$ 1.74 | 5.40 $\pm$ 1.08 | 5.18 $\pm$ 0.64 | 6.19 $\pm$ 0.74 | 6.62 $\pm$ 0.63 | 6.67 $\pm$ 1.36 | 5.84 $\pm$ 1.20 | 5.63 $\pm$ 0.56 | 4.59 $\pm$ 0.68 | 4.53 $\pm$ 0.47 | 4.29 $\pm$ 0.70 |
| Cytidine                | 7.81(d)                    | 0.65 $\pm$ 0.18 | 0.47 $\pm$ 0.23 | 0.61 $\pm$ 0.45 | 0.71 $\pm$ 0.43 | 0.67 $\pm$ 0.26 | 0.79 $\pm$ 0.34 | 0.80 $\pm$ 0.34 | 0.93 $\pm$ 0.34 | 0.53 $\pm$ 0.08 | 0.56 $\pm$ 0.13 | 0.60 $\pm$ 0.24 | 0.67 $\pm$ 0.18 |
| Dimethylamine           | 2.72(s)                    | 0.05 $\pm$ 0.02 | 0.05 $\pm$ 0.01 | 0.05 $\pm$ 0.02 | 0.06 $\pm$ 0.01 | 0.02 $\pm$ 0.01 | 0.03 $\pm$ 0.01 | 0.02 $\pm$ 0.01 | 0.02 $\pm$ 0.01 | 0.03 $\pm$ 0.02 | 0.06 $\pm$ 0.03 | 0.05 $\pm$ 0.03 | 0.04 $\pm$ 0.02 |
| Ethanolamine            | 3.86(t)                    | 0.59 $\pm$ 0.19 | 0.73 $\pm$ 0.19 | 0.94 $\pm$ 0.25 | 0.65 $\pm$ 0.10 | 0.58 $\pm$ 0.21 | 0.51 $\pm$ 0.14 | 0.50 $\pm$ 0.16 | 0.53 $\pm$ 0.14 | 0.77 $\pm$ 0.20 | 0.66 $\pm$ 0.17 | 0.52 $\pm$ 0.22 | 0.49 $\pm$ 0.16 |
| Formate                 | 8.46(s)                    | 0.53 $\pm$ 0.23 | 0.38 $\pm$ 0.15 | 0.67 $\pm$ 0.40 | 0.26 $\pm$ 0.12 | 0.08 $\pm$ 0.05 | 0.08 $\pm$ 0.03 | 0.11 $\pm$ 0.04 | 0.08 $\pm$ 0.02 | 0.08 $\pm$ 0.04 | 0.06 $\pm$ 0.02 | 0.05 $\pm$ 0.10 | 0.05 $\pm$ 0.04 |
| Fumarate                | 6.52(s)                    | 0.10 $\pm$ 0.04 | 0.10 $\pm$ 0.01 | 0.09 $\pm$ 0.04 | 0.08 $\pm$ 0.05 | 0.11 $\pm$ 0.03 | 0.13 $\pm$ 0.03 | 0.16 $\pm$ 0.05 | 0.12 $\pm$ 0.04 | 0.08 $\pm$ 0.01 | 0.08 $\pm$ 0.03 | 0.06 $\pm$ 0.02 | 0.06 $\pm$ 0.02 |
| Glutamate               | 2.35(m)                    | 6.41 $\pm$ 1.27 | 5.97 $\pm$ 1.19 | 6.57 $\pm$ 1.63 | 7.14 $\pm$ 1.01 | 5.95 $\pm$ 1.07 | 6.36 $\pm$ 0.94 | 5.86 $\pm$ 0.85 | 6.52 $\pm$ 0.77 | 5.13 $\pm$ 0.74 | 3.42 $\pm$ 0.58 | 3.56 $\pm$ 1.01 | 2.95 $\pm$ 0.70 |
| Glutamine               | 2.45(m)                    | 0.61 $\pm$ 0.24 | 0.73 $\pm$ 0.16 | 0.93 $\pm$ 0.21 | 0.70 $\pm$ 0.23 | 0.70 $\pm$ 0.07 | 0.77 $\pm$ 0.10 | 0.79 $\pm$ 0.19 | 0.81 $\pm$ 0.16 | 0.55 $\pm$ 0.08 | 0.43 $\pm$ 0.06 | 0.42 $\pm$ 0.04 | 0.35 $\pm$ 0.09 |
| Glycerol                | 3.66(dd)                   | 0.50 $\pm$ 0.34 | 0.61 $\pm$ 0.19 | 0.92 $\pm$ 0.67 | 0.84 $\pm$ 0.30 | 0.56 $\pm$ 0.25 | 0.58 $\pm$ 0.26 | 0.58 $\pm$ 0.20 | 0.52 $\pm$ 0.17 | 0.57 $\pm$ 0.29 | 0.36 $\pm$ 0.22 | 0.35 $\pm$ 0.15 | 0.33 $\pm$ 0.19 |

|                                      |         |            |            |            |            |            |            |            |            |            |            |            |            |
|--------------------------------------|---------|------------|------------|------------|------------|------------|------------|------------|------------|------------|------------|------------|------------|
| Glycine                              | 3.56(s) | 0.09±0.14  | 0.13±0.09  | 0.24±0.34  | 0.59±0.47  | 0.02±0.06  | 0.04±0.05  | 0.02±0.05  | 0.02±0.04  | 0.10±0.10  | 0.06±0.05  | 0.06±0.06  | 0.06±0.04  |
| Hypoxanthine                         | 8.20(s) | 0.65±0.71  | 0.78±0.70  | 0.98±0.38  | 0.52±0.57  | 0.64±0.27  | 0.84±0.30  | 1.07±0.48  | 0.71±0.29  | 0.37±0.15  | 0.47±0.12  | 0.67±0.65  | 0.46±0.30  |
| Inosine                              | 8.34(s) | 0.56±0.74  | 0.54±0.66  | 0.88±0.93  | 0.68±0.92  | 1.58±0.73  | 1.83±0.64  | 1.75±1.02  | 1.81±0.91  | 2.55±0.41  | 2.01±0.38  | 1.64±1.28  | 1.83±0.59  |
| Isobutyrate                          | 1.07(d) | 0.03±0.02  | 0.01±0.01  | 0.02±0.01  | 0.02±0.01  | 0.02±0.02  | 0.02±0.00  | 0.02±0.01  | 0.02±0.01  | 0.03±0.03  | 0.03±0.02  | 0.03±0.01  | 0.03±0.01  |
| Isoleucine                           | 1.01(d) | 1.99±0.56  | 1.49±0.63  | 2.48±1.25  | 2.31±0.56  | 1.63±0.62  | 1.87±0.89  | 2.01±1.01  | 2.54±1.33  | 0.94±0.42  | 1.28±0.44  | 1.23±0.42  | 1.35±0.74  |
| Lactate                              | 1.33(d) | 13.34±1.23 | 14.51±2.28 | 14.52±1.56 | 12.90±0.63 | 12.89±2.00 | 14.37±1.70 | 14.47±0.93 | 14.24±1.07 | 12.46±0.71 | 15.78±0.86 | 19.02±1.27 | 15.14±1.01 |
| Leucine                              | 0.96(t) | 3.19±0.92  | 2.47±1.15  | 2.76±0.97  | 3.71±0.94  | 2.15±0.86  | 2.58±1.17  | 2.66±1.41  | 3.40±1.59  | 1.36±0.80  | 1.40±0.62  | 1.41±0.67  | 1.71±1.06  |
| Lysine                               | 1.73(m) | 1.67±0.97  | 1.47±0.80  | 2.34±1.74  | 2.52±1.41  | 1.40±0.88  | 1.89±1.14  | 1.73±1.23  | 2.17±1.28  | 0.82±0.54  | 0.53±0.47  | 0.52±0.58  | 0.53±0.69  |
| Malonate                             | 3.11(s) | 0.47±0.14  | 0.86±0.13  | 0.66±0.09  | 0.83±0.24  | 0.45±0.12  | 0.67±0.28  | 0.59±0.35  | 0.64±0.25  | 0.36±0.13  | 0.31±0.09  | 0.41±0.15  | 0.28±0.14  |
| Methanol                             | 3.36(s) | 0.02±0.03  | 0.01±0.05  | 0.02±0.04  | 0.03±0.03  | 0.01±0.02  | 0.03±0.03  | 0.02±0.04  | 0.04±0.01  | 0.02±0.05  | 0.03±0.02  | 0.02±0.04  | 0.03±0.03  |
| Methionine                           | 2.63(t) | 0.28±0.08  | 0.31±0.05  | 0.26±0.13  | 0.37±0.14  | 0.29±0.09  | 0.32±0.10  | 0.32±0.13  | 0.40±0.14  | 0.14±0.09  | 0.11±0.04  | 0.12±0.04  | 0.15±0.06  |
| myo-Inositol                         | 4.07(m) | 0.48±0.37  | 0.49±0.29  | 0.36±0.36  | 0.50±0.24  | 0.76±0.36  | 0.70±0.39  | 0.89±0.41  | 0.70±0.31  | 0.73±0.31  | 0.35±0.39  | 0.31±0.38  | 0.31±0.24  |
| Nicotinamide<br>adenine dinucleotide | 6.12(d) | 0.28±0.34  | 0.27±0.30  | 0.42±0.45  | 0.32±0.42  | 0.79±0.34  | 0.90±0.30  | 0.84±0.52  | 0.88±0.44  | 1.22±0.13  | 1.42±0.18  | 1.07±0.68  | 1.13±0.26  |
| Phenylalanine                        | 7.42(s) | 0.48±0.11  | 0.38±0.19  | 0.48±0.17  | 0.59±0.12  | 0.38±0.12  | 0.45±0.19  | 0.46±0.23  | 0.60±0.29  | 0.20±0.09  | 0.28±0.09  | 0.28±0.07  | 0.31±0.18  |
| Phosphocholine                       | 3.21(s) | 1.04±0.53  | 1.24±0.70  | 0.92±0.41  | 1.13±0.51  | 1.36±0.63  | 1.38±0.67  | 1.34±0.61  | 1.21±0.49  | 1.39±0.61  | 0.67±0.57  | 0.62±0.48  | 0.53±0.47  |
| Proline                              | 3.33(m) | 1.40±0.44  | 1.45±0.38  | 1.68±0.58  | 1.55±0.23  | 1.21±0.32  | 1.64±0.31  | 1.19±0.37  | 1.37±0.38  | 0.76±0.47  | 0.88±0.33  | 0.75±0.27  | 0.98±0.35  |
| Pyruvate                             | 2.37(s) | 0.89±0.21  | 0.89±0.18  | 1.03±0.33  | 1.03±0.12  | 0.87±0.21  | 0.93±0.15  | 0.81±0.14  | 0.95±0.13  | 0.69±0.11  | 0.85±0.12  | 0.75±0.18  | 0.74±0.13  |
| Succinate                            | 2.40(s) | 0.04±0.04  | 0.03±0.03  | 0.01±0.02  | 0.04±0.02  | 0.03±0.03  | 0.02±0.01  | 0.01±0.01  | 0.02±0.01  | 0.01±0.01  | 0.02±0.01  | 0.02±0.01  | 0.01±0.01  |
| Taurine                              | 3.27(t) | 17.80±3.22 | 31.52±4.51 | 25.69±7.32 | 26.27±4.21 | 18.27±2.64 | 30.26±4.17 | 33.94±7.62 | 30.00±6.88 | 20.42±2.26 | 26.87±1.95 | 26.51±3.51 | 27.75±3.75 |
| Trimethylamine                       | 2.89(s) | 0.01±0.01  | 0.01±0.01  | 0.00±0.01  | 0.01±0.01  | 0.01±0.00  | 0.02±0.01  | 0.02±0.01  | 0.01±0.01  | 0.01±0.01  | 0.01±0.00  | 0.01±0.01  | 0.01±0.01  |
| Tyrosine                             | 6.90(d) | 1.32±0.30  | 1.15±0.48  | 1.68±0.43  | 1.59±0.32  | 1.14±0.26  | 1.28±0.43  | 1.32±0.51  | 1.65±0.62  | 0.71±0.19  | 0.88±0.22  | 0.89±0.10  | 0.93±0.37  |
| Uracil                               | 7.55(d) | 0.47±0.15  | 0.42±0.18  | 0.42±0.14  | 0.56±0.20  | 0.27±0.10  | 0.31±0.11  | 0.31±0.08  | 0.33±0.24  | 0.13±0.04  | 0.24±0.09  | 0.25±0.08  | 0.25±0.10  |
| Uridine                              | 7.89(d) | 0.24±0.23  | 0.16±0.11  | 0.38±0.15  | 0.14±0.17  | 0.60±0.15  | 0.67±0.15  | 0.74±0.17  | 0.67±0.21  | 0.67±0.15  | 0.46±0.12  | 0.39±0.18  | 0.43±0.17  |
| Uridine diphosphate<br>glucose       | 7.96(d) | 0.08±0.09  | 0.11±0.14  | 0.11±0.16  | 0.08±0.16  | 0.01±0.05  | 0.01±0.05  | 0.01±0.08  | 0.04±0.10  | 0.06±0.11  | 0.02±0.07  | 0.01±0.03  | 0.02±0.04  |
| Urocanate                            | 7.38(s) | 0.72±0.15  | 0.54±0.22  | 0.64±0.24  | 0.82±0.13  | 0.50±0.18  | 0.61±0.24  | 0.62±0.29  | 0.82±0.37  | 0.31±0.12  | 0.41±0.13  | 0.41±0.06  | 0.42±0.24  |



|                 |         |           |           |           |           |           |           |           |           |           |           |           |           |
|-----------------|---------|-----------|-----------|-----------|-----------|-----------|-----------|-----------|-----------|-----------|-----------|-----------|-----------|
| Valine          | 0.99(d) | 3.36±0.96 | 2.69±1.33 | 4.87±2.37 | 3.89±0.95 | 2.76±1.00 | 3.17±1.25 | 3.52±1.45 | 3.88±1.70 | 1.86±0.71 | 2.56±0.86 | 2.39±0.73 | 2.49±1.07 |
| α-Glucose       | 5.24(d) | 4.04±2.12 | 3.87±1.49 | 3.36±2.45 | 2.90±1.25 | 3.06±0.97 | 2.73±0.27 | 2.53±0.64 | 2.45±0.58 | 3.96±0.49 | 2.49±0.87 | 2.39±1.38 | 2.27±0.81 |
| α-Ketoglutarate | 3.01(t) | 0.91±0.26 | 0.72±0.22 | 0.81±0.24 | 1.40±0.47 | 0.77±0.14 | 1.12±0.20 | 0.97±0.30 | 1.18±0.45 | 0.50±0.14 | 0.43±0.17 | 0.55±0.12 | 0.54±0.12 |
| β-Glucose       | 4.67(d) | 2.87±1.54 | 2.81±1.12 | 2.61±1.97 | 2.07±0.79 | 2.32±0.76 | 1.96±0.22 | 1.87±0.46 | 1.80±0.45 | 3.08±0.50 | 1.82±0.73 | 1.70±1.04 | 1.75±0.63 |

30 SD: the standard deviation

31
